# Supplementary material
Source: PubMed Central journal article supplement (PMC124907)

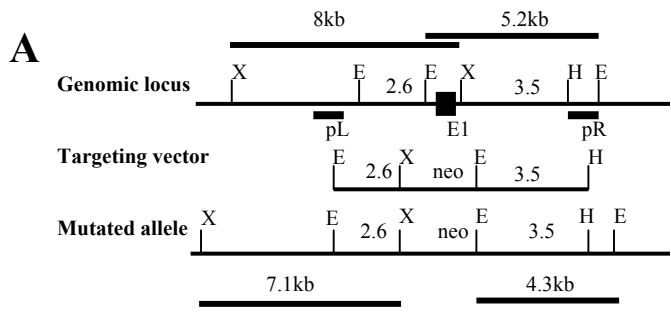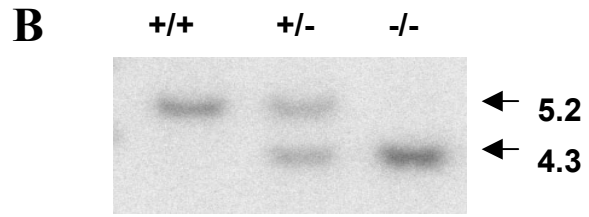

Supplement: pnas_162352599_5.pdf [file pnas_162352599_5.pdf]

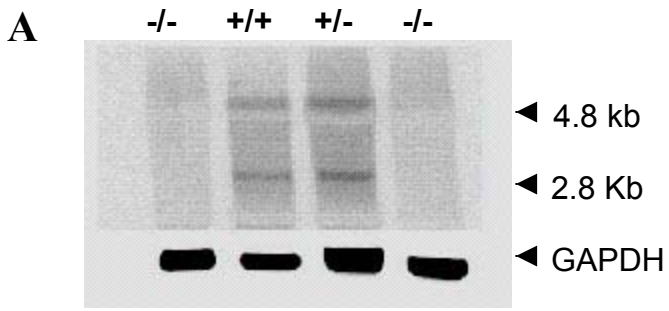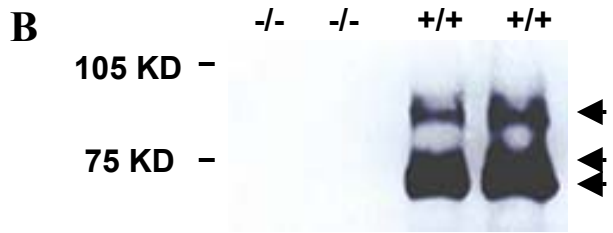

Supplement: pnas_162352599_6.pdf [file pnas_162352599_6.pdf]

# Insulin products in pancreatic fractions

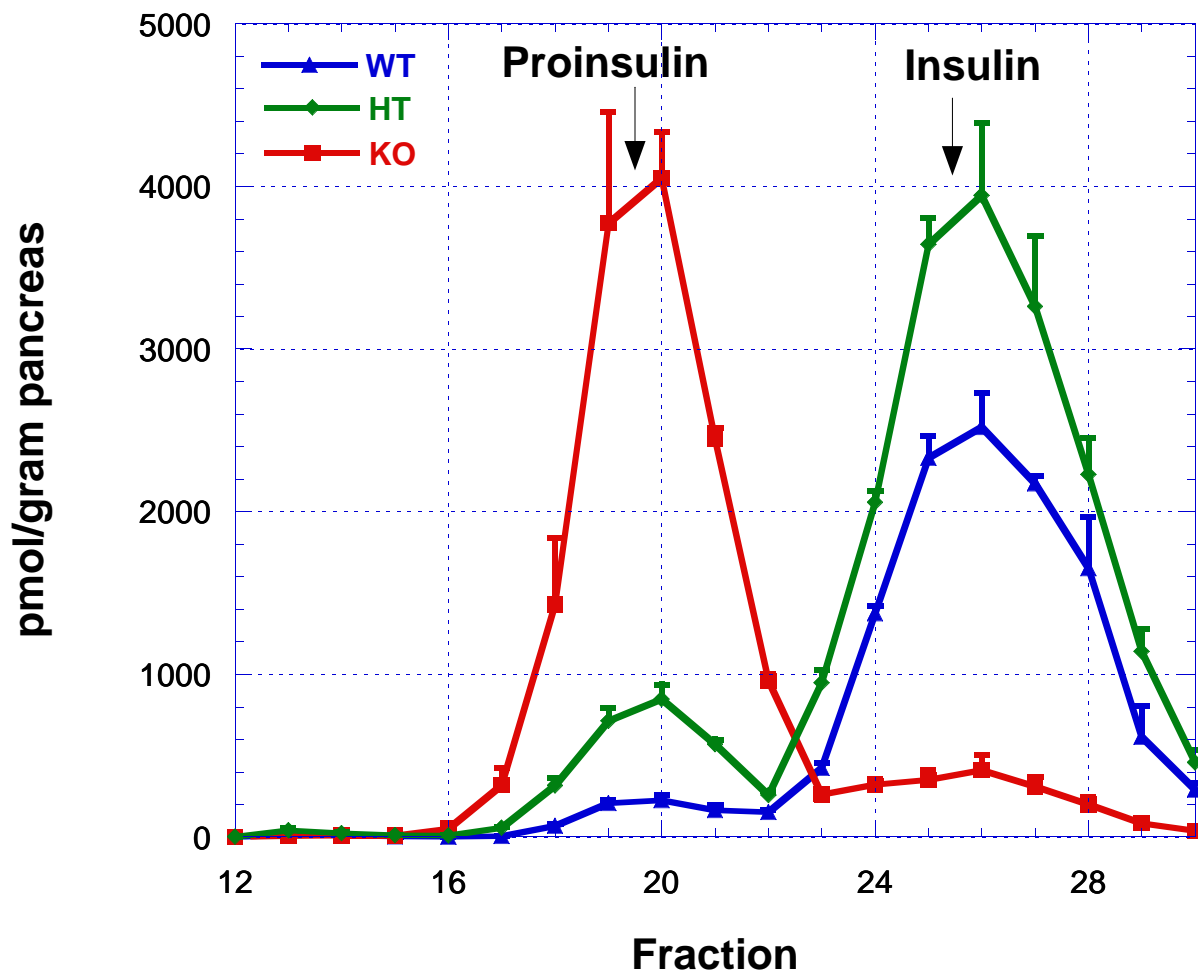

Supplement: pnas_162352599_7.pdf [file pnas_162352599_7.pdf]
